# Supplementary material for: Low transition rate from normo- and low microalbuminuria to proteinuria in Japanese type 2 diabetic individuals: the Japan Diabetes Complications Study (JDCS)
Source: PubMed Central journal article supplement — Diabetologia. 2011 Feb 1;54(5):1025–31. doi: 10.1007/s00125-010-2025-0 (PMC3071947; doi:10.1007/s00125-010-2025-0), 2011-02-01
Supplement: 125_2010_2025_MOESM1_ESM.pdf [file 125_2010_2025_MOESM1_ESM.pdf]

## **Electronic supplementary material**

### **The JDCS Group**

(including current and former members with their affiliations at the time of their participation in this study).

*Primary investigator* N. Yamada, University of Tsukuba, Tsukuba.

*Chief in Assessment Committee* Y. Akanuma, Institute for Adult Diseases Asahi Life Foundation, Tokyo.

*Secretary-General* H. Sone, University of Tsukuba, Tsukuba.

*Members* K. Ato, M. Eto and H. Ito, Asahikawa Medical College, Asahikawa; N. Hashimoto, A. Kanatsuka, Y. Saito, K. Sakurai, K. Takahashi, K. Yagi and K. Yokote, Chiba University, Chiba; T. Takekoshi and T. Wakasugi, Fukui Prefectural Hospital, Fukui; S. Toyooka, Fukui Red Cross Hospital, Fukui; Y. Bando, Fukui Saiseikai Hospital, Fukui; T. Nakai, K. Oida and J. Suzuki, Fukui University, Fukui; Y. Fukumoto and S. Sumi, Garatia Hospital, Minoh; T. Awaya, G. Egusa, R. Fujikawa, M. Okubo and K. Yamane, Hiroshima University, Hiroshima; T. Koike and N. Yoshioka, Hokkaido University, Sapporo; Y. Akanuma, M. Anai, R. Honda and M. Kikuchi, Institute for Adult Diseases Asahi Life Foundation, Tokyo; S. Ishibashi, Jichi Medical School, Minamikawachigun; M. Kawakami, K. Namai, H. Tamemoto and H. Toyoshima, Jichi Medical School Saitama Medical Centre, Saitama; M. Nemoto and T. Sasaki, Jikei University, Tokyo; R. Kawamori and Y. Tanaka, Juntendo University, Tokyo; T. Ishida, Kagawa University, Takamatsu; T. Kawai and I. Takei, Keio University, Tokyo; Y. Fujita, K. Tanaka and Y. Yajima, Kitasato University, Sagamihara; H. Kishikawa, T. Toyonaga and K. Tsuruzoe, Kumamoto University, Kumamoto; Y. Imamura, S. Komichi, Z. Makita, K. Nonaka and K. Yamada, Kurume University, Kurume; N. Nakamura and K. Nakano, Kyoto Prefectural University of Medicine, Kyoto; T. Iguchi and H. Nawata, Kyushu University, Fukuoka; Y. Matsushima, Matsudo City Hospital, Matsudo; H. Takahashi, Minami Akatsuka Clinic, Mito; H. Toyoshima, Minoh City Hospital, Minoh; S. Akazawa, E. Kawasaki, S. Nagataki, Nagasaki University, Nagasaki; T. Hayashi, N. Hotta and J. Nakamura, Nagoya University, Nagoya; K. Doi, Y. Harano, H. Makino and Y. Yoshimasa, National Cardiovascular Centre, Suita; Y. Hayashi, Nihon University, Tokyo; S. Oikawa, Nippon Medical School, Tokyo; R. Abe, Ohta Memorial Hospital, Kooriyama; H. Seino, S. Suzuki and D. Yamada, Ohta-Nishinouchi Hospital, Kooriyama; M. Hoshi, E. Imano and T. Watarai, Osaka Koseinenkin Hospital, Osaka;

M. Imaizumi and R. Todo, Osaka National Hospital, Osaka; K. Kosugi, Y. Shimizu and Y. Umayahara, Osaka Police Hospital, Osaka; M. Matsuhisa, J. Miyagawa, M. Nanba, K. Okita, K. Takemura and Y. Yamasaki, Osaka University, Osaka; Y. Atsumi, K. Hosokawa and K. Matsuoka, Saiseikai Central Hospital, Tokyo; J. Nakano and H. Umezu, Saiseikai Fukushima General Hospital, Fukushima; A. Hoshino, T. Nishiyama and T. Nogami, Saiseikai Kumamoto Hospital, Kumamoto; H. Nunome, Saiseikai Mito Hospital, Mito; S. Katayama, S. Kurihara and A. Togashi, Saitama Medical College, Irumagun; K. Yamada, Sakura National Hospital, Sakura; S. Araki, A. Kashiwagi and Y. Nishio, Shiga University of Medical Science, Otsu; Y. Yoshimura, Shikoku University, Tokushima; T. Inoue, Shizuoka General Hospital, Shizuoka; M. Kitaoka, Showa General Hospital, Kodaira; T. Kitada, A. Shirai and R. Watanabe, Takeda General Hospital, Aizu; T. Miyagawa, Tama Minami Clinic, Tama; O. Mokuta, R. Okazaki and Y. Sakamoto, Teikyo University Ichihara Hospital, Ichihara; Y. Ishigaki and K. Takahashi, Tohoku University, Sendai; Y. Miyashita and K. Shirai, Toho University Sakura Hospital, Sakura; A. Tanaka, Tokyo Medical and Dental University, Tokyo; Y. Fujita, Tokyo Metropolitan Institute of Gerontology, Tokyo; H. Ito, Tokyo Metropolitan Geriatric Hospital, Tokyo; Y. Iwamoto, R. Kawahara, Y. Omori and A. Sato, Tokyo Women's Medical University, Tokyo; Y. Mori, T. Murase, M. Noda and M. Odawara, Toranomon Hospital, Tokyo; M. Kobayashi and M. Urakaze, Toyama University, Toyama; R. Aida, H. Fujii, S. Iimuro, T. Kadowaki, Y. Ohashi, J. Osuga, Y. Ouchi, A. Takahashi, S. Tanaka and S. Tanaka, University of Tokyo, Tokyo; H. Sone, N. Yamada and K. Yamashita, University of Tsukuba, Tsukuba; R. Kawasaki and H. Yamashita, Yamagata University, Yamagata; H. Sekihara and Y. Terauchi, Yokohama City University, Yokohama; T. Nishikawa, Yokohama Rosai Hospital, Yokohama; H. Furuta and K. Nanjo, Wakayama Medical University, Wakayama.
